# Supplementary material for: Cardiac Changes after Lactate-Guided Conditioning in Young Purebred Arabian Horses
Source: MDPI journal article supplement (doi:10.3390/ani13111800), 2023-05-29
Supplement: s1 [file s1]

**Table S1.** Formulae used for calculated parameters.

| Parameter               | Equação                                              |
|-------------------------|------------------------------------------------------|
| MWT (cm)                | $(LVFWd + IVSd)/2$                                   |
| RWT                     | $(LVFWd + IVSd)/LVIDd$                               |
| LV mass (g)             | $1,04 * ([LVIDd + LVFWd + IVSd]^3 - LVIDd^3) - 13,6$ |
| FS (%)                  | $([LVIDd - LVIDs]/LVIDd) * 100$                      |
| LVVd (cm <sup>3</sup> ) | $(7 * [LVIDd^3]/2,4 + LVIDd)$                        |
| LVVs (cm <sup>3</sup> ) | $(7 * [LVIDs^3]/2,4 + LVIDs)$                        |
| EF (%)                  | $(LVVd - LVVs)/LVVd * 100$                           |
| CSA                     | $CSA = \pi * (Ao * 0.5)^2 \text{ (cm)}$              |
| ETI (ms)                | $ET + (0,55 * HR)$                                   |
| SV (mL)                 | $VTI * CSA$                                          |
| SI (mL)                 | $SV/BW$                                              |
| CO (L/min)              | $HR * SV/1000$                                       |
| Vcf (mm/s)              | $(LVIDd - LVIDs)/(LVIDd * ET/1000)$                  |
